# Supplementary material for: Real-World Evidence to Assess Medication Safety or Effectiveness in Children: Systematic Review
Source: PubMed Central journal article supplement — Drugs Real World Outcomes. 2020 Feb 28;7(2):97–107. doi: 10.1007/s40801-020-00182-y (PMC7221095; doi:10.1007/s40801-020-00182-y), 2020-02-28
Supplement: 40801_2020_182_MOESM1_ESM.pdf [file 40801_2020_182_MOESM1_ESM.pdf]

## **Real-world evidence to assess medication safety and effectiveness in children: Systematic Review Drugs – Real-world Outcomes**

Tamar Lasky, PhD, FISPE, Bruce Carleton, PharmD, FISPE, Daniel B. Horton, MD, MSCE, Lauren E. Kelly, PhD, CCRP, Dimitri Bennett, MD, MPH, FISPE, FACE Angela S. Czaja, MD MSc, Dina Gifkins, MPH, PhD, Osemeke U. Osokogu, MD, PhD, MPH, Ann W. McMahon, MD, MS, FISPE

### **Corresponding author:**

Tamar Lasky, PhD, FISPE  
Food and Drug Administration  
Center for Biologics Evaluation and Research  
Office of Biostatistics and Epidemiology  
10903 New Hampshire Avenue  
White Oak – 71, Room 1253  
Silver Spring, MD 20993  
[Tamar.lasky@fda.hhs.gov](mailto:Tamar.lasky@fda.hhs.gov)  
301-796-9178  
ORCID 0000-0003-4104-394X

### **Supplementary online content**

This supplementary material has been provided by the authors to give readers additional information about their work.

#### **eSupplement 1.**

- eAppendix 1. Search strategy
- eAppendix 2. Figure S1. PRISMA flow diagram
- eAppendix 3. Study protocol
- eAppendix 4. Differences between study protocol and study manuscript
- eAppendix 5. Data items extracted

#### **eSupplement 2.**

- eTable S1. Study characteristics
- eTable S2. GRACE assessment scoring

## eAppendix 1. Search strategy

Search of PubMed was conducted on July 5, 2017.

| Strategy | Concept                                   | Search terms                                                                                                                                                                                                                                                                                                                                                                                                                                                                                                                                                                                                                                                                                                                                                                                                                                                                                                                                                                                                                                                                                                                                                                                                                                                                                                                 |
|----------|-------------------------------------------|------------------------------------------------------------------------------------------------------------------------------------------------------------------------------------------------------------------------------------------------------------------------------------------------------------------------------------------------------------------------------------------------------------------------------------------------------------------------------------------------------------------------------------------------------------------------------------------------------------------------------------------------------------------------------------------------------------------------------------------------------------------------------------------------------------------------------------------------------------------------------------------------------------------------------------------------------------------------------------------------------------------------------------------------------------------------------------------------------------------------------------------------------------------------------------------------------------------------------------------------------------------------------------------------------------------------------|
| #1       | Real-world evidence                       | Administrative claims OR Medical records OR Databases, pharmaceutical OR Real-world OR Registries OR pharmacoepidemiology OR Comparative effectiveness research OR drug related side effects and adverse reactions OR treatment outcome OR pragmatic clinical trial OR patient reported outcome measures OR adverse effects OR long term adverse effects OR drug hypersensitivity OR pharmacogenomic testing                                                                                                                                                                                                                                                                                                                                                                                                                                                                                                                                                                                                                                                                                                                                                                                                                                                                                                                 |
| #2       | Medications                               | Medications                                                                                                                                                                                                                                                                                                                                                                                                                                                                                                                                                                                                                                                                                                                                                                                                                                                                                                                                                                                                                                                                                                                                                                                                                                                                                                                  |
| #3       | Pediatric (from Leclercq et al, 2013 (1)) | (Infan* OR newborn* OR new-born* OR perinat* OR neonat* OR baby OR baby* OR babies OR toddler* OR minors OR minors* OR boy OR boys OR boyfriend OR boyhood OR girl* OR kid OR kids OR child OR child* OR children* OR schoolchild* OR schoolchild OR school child[tiab] OR school child*[tiab] OR adolescen* OR juvenil* OR youth* OR teen* OR under*age* OR pubescen* OR pediatrics[mh] OR pediatric* OR paediatric* OR peadiatric* OR school[tiab] OR school*[tiab] OR prematur* OR preterm*)                                                                                                                                                                                                                                                                                                                                                                                                                                                                                                                                                                                                                                                                                                                                                                                                                              |
| #4       | #1 AND #2 AND #3                          |                                                                                                                                                                                                                                                                                                                                                                                                                                                                                                                                                                                                                                                                                                                                                                                                                                                                                                                                                                                                                                                                                                                                                                                                                                                                                                                              |
| #5       | Pediatric journals (three)                | ((("Pediatrics"[Journal]) OR "The Journal of pediatrics"[Journal]) OR "JAMA pediatrics"[Journal])                                                                                                                                                                                                                                                                                                                                                                                                                                                                                                                                                                                                                                                                                                                                                                                                                                                                                                                                                                                                                                                                                                                                                                                                                            |
| #6       | Medications                               | Medications                                                                                                                                                                                                                                                                                                                                                                                                                                                                                                                                                                                                                                                                                                                                                                                                                                                                                                                                                                                                                                                                                                                                                                                                                                                                                                                  |
| #7       | #5 AND #6                                 |                                                                                                                                                                                                                                                                                                                                                                                                                                                                                                                                                                                                                                                                                                                                                                                                                                                                                                                                                                                                                                                                                                                                                                                                                                                                                                                              |
| #8       | Exclusions                                | ((("Clinical Trial"[pt] OR "Editorial"[pt] OR "Letter"[pt] OR "Randomized Controlled Trial"[pt] OR "Clinical Trial, Phase I"[pt] OR "Clinical Trial, Phase II"[pt] OR "Clinical Trial, Phase III"[pt] OR "Clinical Trial, Phase IV"[pt] OR "Comment"[pt] OR "Controlled Clinical Trial"[pt] OR "Letter"[pt] OR "Case Reports"[pt] OR "classical article"[Publication Type] OR "clinical conference"[Publication Type] OR "collected works"[Publication Type] OR "congresses"[Publication Type] OR "consensus development conference"[Publication Type] OR "directory"[Publication Type] OR "duplicate publication"[Publication Type] OR "ephemera"[Publication Type] OR "guideline"[Publication Type] OR "historical article"[Publication Type] OR "lectures"[Publication Type] OR "legal cases"[Publication Type] OR "legislation"[Publication Type] OR "news"[Publication Type] OR "newspaper article"[Publication Type] OR "patient education handout"[Publication Type] OR "personal narratives"[Publication Type] OR "pictorial works"[Publication Type] OR "practice guideline"[Publication Type] OR "video audio media"[Publication Type] OR "webcasts"[Publication Type] OR "Clinical Trials as Topic"[Mesh] OR "double-blind"[All] OR "placebo-controlled"[All] OR "pilot study"[All] OR "pilot projects"[Mesh])))) |
| #9       | #4 OR #7                                  |                                                                                                                                                                                                                                                                                                                                                                                                                                                                                                                                                                                                                                                                                                                                                                                                                                                                                                                                                                                                                                                                                                                                                                                                                                                                                                                              |
| #10      | #9 NOT #8                                 |                                                                                                                                                                                                                                                                                                                                                                                                                                                                                                                                                                                                                                                                                                                                                                                                                                                                                                                                                                                                                                                                                                                                                                                                                                                                                                                              |
| Filters  |                                           | Published between January 1, 2016 and December 31, 2016<br>English<br>Humans                                                                                                                                                                                                                                                                                                                                                                                                                                                                                                                                                                                                                                                                                                                                                                                                                                                                                                                                                                                                                                                                                                                                                                                                                                                 |

eAppendix 2. Figure S1. PRISMA flow diagram

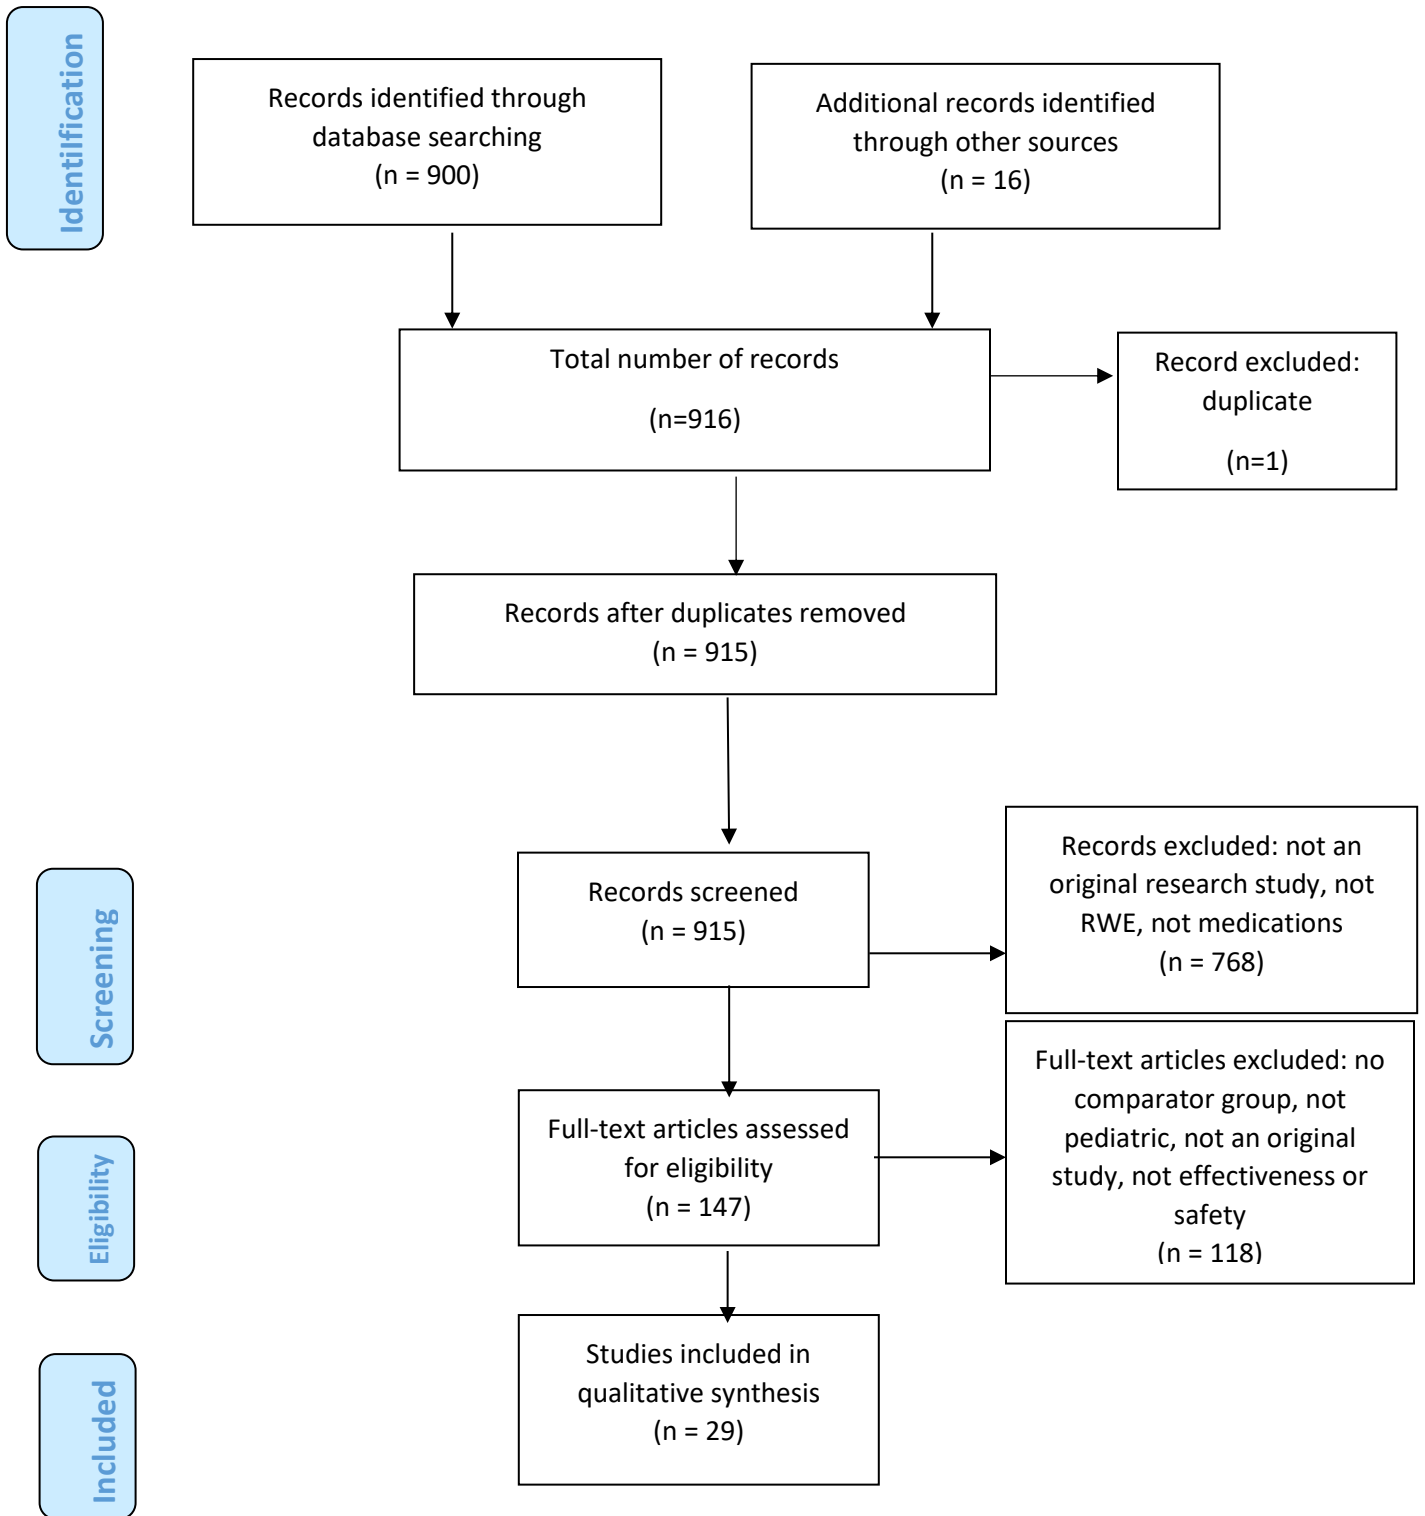

## **eAppendix 3. Study Protocol**

### **Specific Objectives**

To describe the current state of RWE in pediatric pharmacoepidemiology by identifying studies published during a 1 year period (2016) that use RWE to assess effectiveness or safety of a medication in pediatric populations.

To describe the number of studies using RWE by: country, disease area, medication, pediatric age group, safety/effectiveness and type of RWE.

### **Criteria for including studies in review**

#### **Population**

Pediatric will be defined as “under 18 years”. The age of interest is the earliest age at exposure to medications studies (i.e., if patients are children when exposed and followed into adulthood to determine long term effects, the population will be considered to be pediatric). This will exclude studies where exposure takes place during pregnancy.

#### **Interventions or exposures: Medications**

All prescription medications will be included. The search strategy will not attempt to identify over the counter (OTC) medicines or other products such as vitamins or supplements. OTC medicines will be included if a study enters the pool of eligible studies, but the search strategy will not be designed to retrieve articles about OTC medicines. Studies of vaccines will not be included.

#### **Outcomes of interest**

All safety and effectiveness endpoints.

#### **Setting**

Real-World Evidence (RWE) is defined as “information on health care that is derived from multiple sources outside typical clinical research settings, including electronic health records (EHRs), claims and billing data, product and disease registries, and data gathered through personal devices and health applications.”(2) This is interpreted to mean that a range of sources can be considered to be RWE and does not require that a study use more than one source.

#### **Additional exclusion criteria**

Published before January 1, 2016 and after December 31, 2016.

Pragmatic trials, randomized (and non-randomized) Clinical Trials.

Observational studies that assessed pharmacoconomics and health services utilization or drug utilization (without consideration of effectiveness or safety outcomes).

Abstracts only (no full manuscripts), duplicate studies, preliminary publications.

Non-English publications.

Case studies, case series, letters, reviews (systematic and non-systematic), although systematic reviews will be hand searched for studies not retrieved by the search strategy.

Studies with exposure occurring as a fetus or exposure through breast milk.

#### **Search methods**

Studies will be identified using a three-pronged approach: 1) electronic search using search terms, 2) search of three pediatric journals for articles about medications, and 3) extended search. See supplement xx for full search strategy.

##### **1. Electronic search for RWE and pediatric as concepts**

An electronic search of PubMed using terms for the concepts of RWE and pediatric, published in 2016, in English, and in Humans only.

##### **2. Search of three pediatric journals**

An electronic search of three journals, Pediatrics, J Pediatrics, and JAMA Pediatrics, for studies of medications, published in 2016, in English, and in Humans only. These journals were selected by the authors through consensus.

### **3. Extended search**

The references cited in reviews identified in the search will be hand searched for citations of potential relevance to the current study. Working group members will provide expert suggestions on citations that may have been missed in the other search efforts.

### **Screening**

#### **Screen 1. Titles and abstracts**

Abstracts and titles will be screened against inclusion criteria by two reviewers. If either reviewer recommends the title for screening it will be included. Review of the titles and abstracts will be recorded on an Excel spreadsheet.

#### **Screen 2. Full text**

Full text will be retrieved for citations meeting eligibility criteria in Screen 1. Full text articles will be screened against inclusion criteria by two reviewers. Differences in assessments will be discussed by the two reviewers and adjudicated by a third reviewer if necessary. Review of full-text articles against eligibility criteria will be recorded on an Excel spreadsheet.

#### **Data extraction of full text articles**

Articles meeting the eligibility criteria in Screen 2 will be extracted using a standardized data extraction form (Excel spreadsheet). One reviewer will extract data for each article, and a second reviewer will review the extracted data.

#### **Quality appraisal/assessment**

Included studies will be assessed using the Good Research for Comparative Effectiveness (GRACE) Checklist (3).

#### **Summary tables**

Summary tables will describe the number of studies using RWE by: country, disease area, medication, pediatric age group, safety/effectiveness and type of RWE. We will report on numbers of studies, and numbers of children included in each study.

#### **Anticipated or actual start date**

March 2017

#### **Anticipated completion date**

February 2018

#### **Funding sources/sponsors**

None

#### **Conflicts of interest**

None known

#### eAppendix 4. Differences between study protocol and study manuscript

| <b>Section</b>                               | <b>Protocol</b>           | <b>Final study as reported in manuscript</b>                          | <b>Reasons for changes</b>                              |
|----------------------------------------------|---------------------------|-----------------------------------------------------------------------|---------------------------------------------------------|
| Criteria for including studies in the review | Described in the protocol | Additional exclusion:<br>Studies without control or comparator groups | Additional exclusion criteria                           |
| Objectives, Summary tables                   | Describe type of RWE      | Describe data collection approaches, data sources                     | Clearer and more specific than categorizing type of RWE |

## **eAppendix 5. Data items extracted**

1. Study years
2. Study population age
3. Countries where study was conducted
4. Disease or condition defining the patient population
5. Study design
6. Medication that defined exposure
7. Control/comparison group
8. Data source used
9. Name of the database
10. Statistical methods used to test study hypotheses
11. Statistical methods used to control for potential confounding
12. Linkage to parental or sibling data
13. Linkage to school data
14. Safety endpoints
15. Effectiveness endpoints

## References eSupplement 1

1. Leclercq E, Leeftang MM, van Dalen EC, Kremer LC. Validation of search filters for identifying pediatric studies in PubMed. *The Journal of pediatrics*. 2013;162(3):629-34.e2.
2. Sherman RE, Anderson SA, Dal Pan GJ, Gray GW, Gross T, Hunter NL, et al. Real-World Evidence - What Is It and What Can It Tell Us? *N Engl J Med*. 2016;375(23):2293-7.
3. Dreyer NA, Bryant A, Velentgas P. The GRACE Checklist: A Validated Assessment Tool for High Quality Observational Studies of Comparative Effectiveness. *J Manag Care Spec Pharm*. 2016;22(10):1107-13.

### **Real-world evidence to assess medication safety and effectiveness in children: Systematic Review Drugs – Real-world Outcomes**

Tamar Lasky, PhD, FISPE, Bruce Carleton, PharmD, FISPE, Daniel B. Horton, MD, MSCE, Lauren E. Kelly, PhD, CCRP, Dimitri Bennett, MD, MPH, FISPE, FACE Angela S. Czaja, MD MSc, Dina Gifkins, MPH, PhD, Osemeke U. Osokogu, MD, PhD, MPH, Ann W. McMahon, MD, MS, FISPE

#### **Corresponding author:**

Tamar Lasky, PhD, FISPE  
Food and Drug Administration  
Center for Biologics Evaluation and Research  
Office of Biostatistics and Epidemiology  
10903 New Hampshire Avenue  
White Oak – 71, Room 1253  
Silver Spring, MD 20993  
[Tamar.lasky@fda.hhs.gov](mailto:Tamar.lasky@fda.hhs.gov)  
301-796-9178  
ORCID 0000-0003-4104-394X



## eSupplement 2

eTable S1. Study characteristics

| Author              | Country(ies) where study was conducted | Sample size in studies where study population is under 18 | Age range                                     | Disease or condition defining the patient population | Medication(s) in exposure or treatment group                                                                           | Comparator/control group | Primary safety endpoint                                                    | Primary effectiveness endpoint                       | Study design         | Data collection                                     |
|---------------------|----------------------------------------|-----------------------------------------------------------|-----------------------------------------------|------------------------------------------------------|------------------------------------------------------------------------------------------------------------------------|--------------------------|----------------------------------------------------------------------------|------------------------------------------------------|----------------------|-----------------------------------------------------|
| Barger-Kamate et al | Mali                                   | 307                                                       | 0-10                                          | Malaria                                              | Artemether-lumefantrine                                                                                                | Unexposed or untreated   | NA                                                                         | cytomegalovirus shedding                             | prospective cohort   | Manual record review and/or primary data collection |
| Barnard-Brak et al  | U.S.                                   | 1079                                                      | 6-12                                          | Autism spectrum disorder                             | stimulants                                                                                                             | Unexposed or untreated   | NA                                                                         | improved behavior, communication, and attention      | prospective cohort   | Manual record review and/or primary data collection |
| Barth et al         | Germany                                | Not applicable                                            | not reported                                  | Juvenile idiopathic arthritis                        | antirheumatic drugs                                                                                                    | Another treatment        | malignant tumors                                                           | NA                                                   | case-control         | Manual record review and/or primary data collection |
| Batton et al        | USA                                    | 367                                                       | Preterm, low birth weight or healthy newborns | Preterm infants                                      | fluid bolus ( $\geq 10$ ml/kg of crystalloid), dopamine, dobutamine, hydrocortisone, epinephrine, or any blood product | Another treatment        | incidence of death or neuro-developmental impairment / developmental delay | NA                                                   | prospective cohort   | Manual record review and/or primary data collection |
| Berkenwald et al    | US                                     | Not applicable                                            | 7-18                                          | primary nocturnal enuresis                           | oral desmopressin and oral oxybutynin immediate release                                                                | Different dose           | No primary endpoint specified                                              | minimum of 14 consecutive nights of complete dryness | retrospective cohort | Manual record review and/or primary data collection |
| Brown et al         | US                                     | 544                                                       | infants                                       | single-ventricle heart disease                       | digoxin                                                                                                                | Unexposed or untreated   | NA                                                                         | Interstage mortality                                 | retrospective cohort | Registry                                            |
| Duerden et al       | Canada                                 | 138                                                       | Preterm, low birth weight or                  | Preterm infants                                      | Midazolam, also morphine and fentanyl                                                                                  | Different dose           | Hippocampal growth                                                         | NA                                                   | prospective cohort   | Manual record review and/or primary data collection |

| Author         | Country(ies) where study was conducted | Sample size in studies where study population is under 18 | Age range                                                           | Disease or condition defining the patient population | Medication(s) in exposure or treatment group             | Comparator/control group | Primary safety endpoint           | Primary effectiveness endpoint | Study design         | Data collection                                     |
|----------------|----------------------------------------|-----------------------------------------------------------|---------------------------------------------------------------------|------------------------------------------------------|----------------------------------------------------------|--------------------------|-----------------------------------|--------------------------------|----------------------|-----------------------------------------------------|
| Gracious et al | US                                     | 50673                                                     | 6-17                                                                | Depression children with infections                  | Antidepressants                                          | Unexposed or untreated   | Fracture                          | NA                             | retrospective cohort | Administrative claims                               |
| Horton et al   | UK                                     | 9295                                                      | 1-15                                                                | Infantile spasms                                     | Adrenocorticotropin, oral corticosteroids, or vigabatrin | Another treatment        | NA                                | Infantile spasm remission      | prospective cohort   | Manual record review and/or primary data collection |
| Knupp et al    | USA                                    | 118                                                       | 0-2                                                                 | Juvenile idiopathic arthritis                        | Methotrexate                                             | Unexposed or untreated   | NA                                | prevention of uveitis          | retrospective cohort | Manual record review and/or primary data collection |
| Kostik et al   | Russia                                 | 281                                                       | 2-10                                                                | congenital heart disease                             | histidine-tryptophan-ketoglutarate                       | Another treatment        | NA                                | reduction in mortality         | prospective cohort   | Manual record review and/or primary data collection |
| Li et al       | China                                  | 101                                                       | not reported (mean ages of treatment groups were 3.4 and 1.9 years) | Preterm infants                                      | iron, furosemide                                         | Unexposed or untreated   | Blood acetaldehyde concentrations | NA                             | prospective cohort   | Manual record review and/or primary data collection |
| Pandya et al   | UK                                     | 60                                                        | infants                                                             | infantile spasms                                     | vigabatrin                                               | Unexposed or untreated   | visual field loss                 | NA                             | retrospective cohort | Manual record review and/or primary data collection |
| Schwarz et al  | US                                     | 257                                                       | 0-2                                                                 | children with infections                             | systemic antibiotics                                     | Another treatment        | Obesity                           | NA                             | retrospective cohort | Electronic health records                           |
| Scott et al    | UK                                     | 21714                                                     | 0-2                                                                 | healthy newborns                                     |                                                          |                          |                                   |                                |                      |                                                     |

| <b>Author</b> | <b>Country(ies) where study was conducted</b> | <b>Sample size in studies where study population is under 18</b> | <b>Age range</b>                                 | <b>Disease or condition defining the patient population</b> | <b>Medication(s) in exposure or treatment group</b>                                                                                                                                                        | <b>Comparator/control group</b> | <b>Primary safety endpoint</b>                      | <b>Primary effectiveness endpoint</b> | <b>Study design</b>  | <b>Data collection</b>                              |
|---------------|-----------------------------------------------|------------------------------------------------------------------|--------------------------------------------------|-------------------------------------------------------------|------------------------------------------------------------------------------------------------------------------------------------------------------------------------------------------------------------|---------------------------------|-----------------------------------------------------|---------------------------------------|----------------------|-----------------------------------------------------|
| Sdona et al   | Greece                                        | 1841                                                             | infants                                          | Necrotizing enterocolitis                                   | Intravenous dextrose, phototherapy, or antibiotics                                                                                                                                                         | Another treatment               | necrotizing enterocolitis                           | NA                                    | case-control         | Manual record review and/or primary data collection |
| Shapiro et al | USA                                           | 47                                                               | under 18, lower age bound not reported           | psychiatric patients                                        | topiramate or zonisamide                                                                                                                                                                                   | Another treatment               | NA                                                  | reduction in body mass index          | retrospective cohort | Electronic health records                           |
| Shehab et al  | USA                                           | Not applicable                                                   | under 5 through 17, lower age bound not reported | Emergency Department patients with adverse drug events      | Hematologic, systemic antimicrobial, hormone-modifying, central nervous system, cardiovascular, oncological and immunologic, musculoskeletal, respiratory, gastrointestinal agents and other drug classes. | Another treatment               | Emergency department visits for adverse drug events | NA                                    | case-control         | Manual record review and/or primary data collection |
| Shein et al   | USA                                           | 25                                                               | 2-14                                             | Traumatic brain injury                                      | fentanyl, 3% sodium chloride hypertonic saline, mannitol or pentobarbital                                                                                                                                  | Another treatment               | NA                                                  | reduction in intracranial pressure    | prospective cohort   | Manual record review and/or primary data collection |

| Author          | Country(ies) where study was conducted | Sample size in studies where study population is under 18 | Age range                              | Disease or condition defining the patient population | Medication(s) in exposure or treatment group                                                                                                                                                                          | Comparator/control group | Primary safety endpoint | Primary effectiveness endpoint                       | Study design         | Data collection                                     |
|-----------------|----------------------------------------|-----------------------------------------------------------|----------------------------------------|------------------------------------------------------|-----------------------------------------------------------------------------------------------------------------------------------------------------------------------------------------------------------------------|--------------------------|-------------------------|------------------------------------------------------|----------------------|-----------------------------------------------------|
| Sheridan et al  | US                                     | Not applicable                                            | not reported                           | migraine headache                                    | dopamine antagonists (prochlorperazine, metoclopramide, and promethazine), dihydroergotamine, parental valproate, magnesium, diphenhydramine, triptans, or nonsteroidal anti-inflammatory drugs or opioid medications | Another treatment        | NA                      | hospital length of stay                              | retrospective cohort | Electronic health records                           |
| Shin et al      | South Korea                            | 1224                                                      | under 18, lower age bound not reported | Attention deficit hyperactivity disorder             | methylphenidate                                                                                                                                                                                                       | Self-controlled          | Cardiovascular events   | NA                                                   | self-controlled      | Administrative claims                               |
| Sirois et al    | US, Puerto Rico                        | 524                                                       | 3-16                                   | Human immune-deficiency virus                        | methylphenidate or amphetamine salts                                                                                                                                                                                  | Unexposed or untreated   | NA                      | measures of cognition, behavior, and quality of life | prospective cohort   | Manual record review and/or primary data collection |
| Suruki et al    | USA                                    | 734114                                                    | 0-17                                   | Asthma                                               | asthma medication (e.g. short-acting beta agonist, inhaled corticosteroid [ICS], ICS plus long-acting beta agonist, leukotriene receptor antagonist or omalizumab)                                                    | Different dose           | NA                      | asthma exacerbations                                 | retrospective cohort | Administrative claims                               |
| Tappeiner et al | Germany                                | Not applicable                                            | not reported                           | Juvenile idiopathic arthritis                        | Disease-modifying antirheumatic drugs                                                                                                                                                                                 | Another treatment        | NA                      | Uveitis (prevention)                                 | prospective cohort   | Registry                                            |

| <b>Author</b>        | <b>Country(ies) where study was conducted</b> | <b>Sample size in studies where population is under 18</b> | <b>Age range</b>              | <b>Disease or condition defining the patient population</b> | <b>Medication(s) in exposure or treatment group</b> | <b>Comparator/control group</b> | <b>Primary safety endpoint</b> | <b>Primary effectiveness endpoint</b>     | <b>Study design</b>  | <b>Data collection</b>                              |
|----------------------|-----------------------------------------------|------------------------------------------------------------|-------------------------------|-------------------------------------------------------------|-----------------------------------------------------|---------------------------------|--------------------------------|-------------------------------------------|----------------------|-----------------------------------------------------|
| Tey et al            | Taiwan                                        | 104                                                        | Very low birth weight infants | Very low birth weight infants                               | Aminophylline                                       | Unexposed or untreated          | Neuro-developmental impairment | NA                                        | retrospective cohort | Manual record review and/or primary data collection |
| van der Schans et al | Netherlands                                   | 7994                                                       | 12-13                         | psychiatric patients                                        | antipsychotics                                      | Unexposed or untreated          | NA                             | school performance                        | retrospective cohort | Administrative claims                               |
| Verazza et al        | Italy                                         | 1038                                                       | 1-15                          | Juvenile idiopathic arthritis                               | etanercept                                          | Unexposed or untreated          | No primary endpoint specified  | Juvenile idiopathic arthritis progression | retrospective cohort | Manual record review and/or primary data collection |
| Wang et al           | Australia                                     | Not applicable                                             | 3-18                          | pulmonary embolism                                          | oral contraceptives                                 | Unexposed or untreated          | Pulmonary embolism             | NA                                        | case-control         | Manual record review and/or primary data collection |
| Webb et al           | UK                                            | 104                                                        | 1-15                          | nephrotic syndrome                                          | cyclophosphamide                                    | Another treatment               | No primary endpoint specified  | relapse of nephrotic syndrome             | retrospective cohort | Manual record review and/or primary data collection |

eTable S2. GRACE assessment scoring items D1-D6

| <b>Author</b>            | <b>D1.<br/>Were treatment and/or important details of treatment exposure adequately recorded for the study purpose in the data source(s)?</b> | <b>D2.<br/>Were the primary outcomes adequately recorded for the study purpose?</b> | <b>D3.<br/>Was the primary clinical outcome(s) measured objectively rather than subject to clinical judgment?</b> | <b>D4.<br/>Were primary outcomes validated, adjudicated, or otherwise known to be valid in a similar population?</b> | <b>D5.<br/>Was the primary outcome(s) measured or identified in an equivalent manner between the treatment/intervention group and the comparison group?</b> | <b>D6.<br/>Were important covariates that may be known confounders or effect modifiers available and recorded?</b> |
|--------------------------|-----------------------------------------------------------------------------------------------------------------------------------------------|-------------------------------------------------------------------------------------|-------------------------------------------------------------------------------------------------------------------|----------------------------------------------------------------------------------------------------------------------|-------------------------------------------------------------------------------------------------------------------------------------------------------------|--------------------------------------------------------------------------------------------------------------------|
| Barger-Kamate et al      | 0                                                                                                                                             | 1                                                                                   | 1                                                                                                                 | 1                                                                                                                    | 1                                                                                                                                                           | 0                                                                                                                  |
| Barnard-Brak et al       | 0                                                                                                                                             | 1                                                                                   | 1                                                                                                                 | 1                                                                                                                    | 1                                                                                                                                                           | 0                                                                                                                  |
| Barth et al              | 1                                                                                                                                             | 1                                                                                   | 1                                                                                                                 | 1                                                                                                                    | 1                                                                                                                                                           | 1                                                                                                                  |
| Batton et al             | 1                                                                                                                                             | 1                                                                                   | 1                                                                                                                 | 1                                                                                                                    | 1                                                                                                                                                           | 1                                                                                                                  |
| Berkenwald et al         | 1                                                                                                                                             | 1                                                                                   | 1                                                                                                                 | 1                                                                                                                    | 1                                                                                                                                                           | 1                                                                                                                  |
| Brown et al              | 1                                                                                                                                             | 1                                                                                   | 1                                                                                                                 | 1                                                                                                                    | 1                                                                                                                                                           | 1                                                                                                                  |
| Duerden et al            | 1                                                                                                                                             | 1                                                                                   | 1                                                                                                                 | 1                                                                                                                    | 1                                                                                                                                                           | 0                                                                                                                  |
| Gracious et al           | 1                                                                                                                                             | 1                                                                                   | 1                                                                                                                 | 1                                                                                                                    | 1                                                                                                                                                           | 1                                                                                                                  |
| Horton et al             | 1                                                                                                                                             | 1                                                                                   | 1                                                                                                                 | 1                                                                                                                    | 1                                                                                                                                                           | 1                                                                                                                  |
| Knupp et al              | 1                                                                                                                                             | 1                                                                                   | 1                                                                                                                 | 1                                                                                                                    | 1                                                                                                                                                           | 0                                                                                                                  |
| Kostik et al             | 1                                                                                                                                             | 1                                                                                   | 1                                                                                                                 | 1                                                                                                                    | 1                                                                                                                                                           | 0                                                                                                                  |
| Li et al                 | 0                                                                                                                                             | 1                                                                                   | 1                                                                                                                 | 1                                                                                                                    | 1                                                                                                                                                           | 0                                                                                                                  |
| Pandya et al             | 1                                                                                                                                             | 1                                                                                   | 1                                                                                                                 | 1                                                                                                                    | 1                                                                                                                                                           | 0                                                                                                                  |
| Schwarz et al            | 1                                                                                                                                             | 0                                                                                   | 0                                                                                                                 | 0                                                                                                                    | 0                                                                                                                                                           | 1                                                                                                                  |
| Scott et al              | 1                                                                                                                                             | 1                                                                                   | 1                                                                                                                 | 1                                                                                                                    | 1                                                                                                                                                           | 1                                                                                                                  |
| Sdona et al              | 0                                                                                                                                             | 1                                                                                   | 1                                                                                                                 | 1                                                                                                                    | 1                                                                                                                                                           | 1                                                                                                                  |
| Shapiro et al            | 1                                                                                                                                             | 1                                                                                   | 1                                                                                                                 | 1                                                                                                                    | 1                                                                                                                                                           | 1                                                                                                                  |
| Shehab et al             | 0                                                                                                                                             | 1                                                                                   | 0                                                                                                                 | 1                                                                                                                    | 1                                                                                                                                                           | 1                                                                                                                  |
| Shein et al              | 1                                                                                                                                             | 1                                                                                   | 1                                                                                                                 | 1                                                                                                                    | 1                                                                                                                                                           | 1                                                                                                                  |
| Sheridan et al           | 0                                                                                                                                             | 1                                                                                   | 1                                                                                                                 | 1                                                                                                                    | 1                                                                                                                                                           | 0                                                                                                                  |
| Shin et al               | 1                                                                                                                                             | 1                                                                                   | 1                                                                                                                 | 1                                                                                                                    | 1                                                                                                                                                           | 1                                                                                                                  |
| Sirois et al             | 0                                                                                                                                             | 1                                                                                   | 1                                                                                                                 | 1                                                                                                                    | 1                                                                                                                                                           | 0                                                                                                                  |
| Suruki et al             | 1                                                                                                                                             | 1                                                                                   | 1                                                                                                                 | 1                                                                                                                    | 1                                                                                                                                                           | 0                                                                                                                  |
| Tappeiner et al          | 0                                                                                                                                             | 0                                                                                   | 1                                                                                                                 | 1                                                                                                                    | 1                                                                                                                                                           | 1                                                                                                                  |
| Tey et al                | 1                                                                                                                                             | 1                                                                                   | 1                                                                                                                 | 1                                                                                                                    | 1                                                                                                                                                           | 1                                                                                                                  |
| van der Schans et al     | 1                                                                                                                                             | 1                                                                                   | 1                                                                                                                 | 1                                                                                                                    | 1                                                                                                                                                           | 1                                                                                                                  |
| Verazza et al            | 1                                                                                                                                             | 1                                                                                   | 1                                                                                                                 | 1                                                                                                                    | 1                                                                                                                                                           | 0                                                                                                                  |
| Wang et al               | 1                                                                                                                                             | 1                                                                                   | 1                                                                                                                 | 1                                                                                                                    | 1                                                                                                                                                           | 1                                                                                                                  |
| Webb et al               | 1                                                                                                                                             | 1                                                                                   | 1                                                                                                                 | 1                                                                                                                    | 1                                                                                                                                                           | 1                                                                                                                  |
| Total scored as positive | 21                                                                                                                                            | 27                                                                                  | 27                                                                                                                | 28                                                                                                                   | 28                                                                                                                                                          | 18                                                                                                                 |
| Percentage of total      | 72                                                                                                                                            | 93                                                                                  | 93                                                                                                                | 97                                                                                                                   | 97                                                                                                                                                          | 62                                                                                                                 |



eTable S2 cont'd GRACE assessment scoring items M1-M5 and total scores for each article

| <b>Author</b>            | <b>M1.<br/>Was the study (or analysis) population restricted to new initiators of treatment or those starting a new course of treatment?</b> | <b>M2.<br/>If 1 or more comparison groups were used, were they concurrent comparators? If not, did the authors justify the use of historical comparison groups?</b> | <b>M3.<br/>Were important confounding and effect-modifying variables taken into account in the design and/or analysis?</b> | <b>M4.<br/>Is the classification of exposed and unexposed person-time free of “immortal time bias,”?</b> | <b>M5.<br/>Were any meaningful analyses conducted to test key assumptions on which primary results are based?</b> | <b>Total score for study</b> |
|--------------------------|----------------------------------------------------------------------------------------------------------------------------------------------|---------------------------------------------------------------------------------------------------------------------------------------------------------------------|----------------------------------------------------------------------------------------------------------------------------|----------------------------------------------------------------------------------------------------------|-------------------------------------------------------------------------------------------------------------------|------------------------------|
| Barger-Kamate et al      | 1                                                                                                                                            | 1                                                                                                                                                                   | 0                                                                                                                          | 1                                                                                                        | 0                                                                                                                 | 7                            |
| Barnard-Brak et al       | 0                                                                                                                                            | 1                                                                                                                                                                   | 0                                                                                                                          | 1                                                                                                        | 0                                                                                                                 | 6                            |
| Barth et al              | 0                                                                                                                                            | 1                                                                                                                                                                   | 0                                                                                                                          | 0                                                                                                        | 0                                                                                                                 | 7                            |
| Batton et al             | 0                                                                                                                                            | 1                                                                                                                                                                   | 1                                                                                                                          | 0                                                                                                        | 0                                                                                                                 | 8                            |
| Berkenwald et al         | 0                                                                                                                                            | 1                                                                                                                                                                   | 1                                                                                                                          | 0                                                                                                        | 0                                                                                                                 | 8                            |
| Brown et al              | 0                                                                                                                                            | 1                                                                                                                                                                   | 1                                                                                                                          | 0                                                                                                        | 1                                                                                                                 | 9                            |
| Duerden et al            | 0                                                                                                                                            | 1                                                                                                                                                                   | 1                                                                                                                          | 0                                                                                                        | 0                                                                                                                 | 7                            |
| Gracious et al           | 1                                                                                                                                            | 1                                                                                                                                                                   | 1                                                                                                                          | 0                                                                                                        | 0                                                                                                                 | 9                            |
| Horton et al             | 1                                                                                                                                            | 1                                                                                                                                                                   | 1                                                                                                                          | 0                                                                                                        | 1                                                                                                                 | 10                           |
| Knupp et al              | 0                                                                                                                                            | 1                                                                                                                                                                   | 1                                                                                                                          | 0                                                                                                        | 0                                                                                                                 | 7                            |
| Kostik et al             | 0                                                                                                                                            | 1                                                                                                                                                                   | 0                                                                                                                          | 0                                                                                                        | 0                                                                                                                 | 6                            |
| Li et al                 | 1                                                                                                                                            | 0                                                                                                                                                                   | 1                                                                                                                          | 1                                                                                                        | 0                                                                                                                 | 7                            |
| Pandya et al             | 0                                                                                                                                            | 0                                                                                                                                                                   | 0                                                                                                                          | 1                                                                                                        | 0                                                                                                                 | 6                            |
| Schwarz et al            | 0                                                                                                                                            | 1                                                                                                                                                                   | 0                                                                                                                          | 1                                                                                                        | 0                                                                                                                 | 4                            |
| Scott et al              | 0                                                                                                                                            | 1                                                                                                                                                                   | 1                                                                                                                          | 1                                                                                                        | 1                                                                                                                 | 10                           |
| Sdona et al              | 1                                                                                                                                            | 1                                                                                                                                                                   | 1                                                                                                                          | 1                                                                                                        | 1                                                                                                                 | 10                           |
| Shapiro et al            | 1                                                                                                                                            | 0                                                                                                                                                                   | 1                                                                                                                          | 1                                                                                                        | 1                                                                                                                 | 10                           |
| Shehab et al             | 0                                                                                                                                            | 0                                                                                                                                                                   | 0                                                                                                                          | 0                                                                                                        | 0                                                                                                                 | 4                            |
| Shein et al              | 1                                                                                                                                            | 1                                                                                                                                                                   | 1                                                                                                                          | 1                                                                                                        | 1                                                                                                                 | 11                           |
| Sheridan et al           | 0                                                                                                                                            | 1                                                                                                                                                                   | 0                                                                                                                          | 0                                                                                                        | 0                                                                                                                 | 5                            |
| Shin et al               | 0                                                                                                                                            | 1                                                                                                                                                                   | 1                                                                                                                          | 1                                                                                                        | 1                                                                                                                 | 10                           |
| Sirois et al             | 1                                                                                                                                            | 1                                                                                                                                                                   | 0                                                                                                                          | 0                                                                                                        | 0                                                                                                                 | 6                            |
| Suruki et al             | 0                                                                                                                                            | 0                                                                                                                                                                   | 0                                                                                                                          | 1                                                                                                        | 1                                                                                                                 | 7                            |
| Tappeiner et al          | 0                                                                                                                                            | 1                                                                                                                                                                   | 1                                                                                                                          | 0                                                                                                        | 0                                                                                                                 | 6                            |
| Tey et al                | 1                                                                                                                                            | 1                                                                                                                                                                   | 1                                                                                                                          | 1                                                                                                        | 1                                                                                                                 | 11                           |
| van der Schans et al     | 0                                                                                                                                            | 1                                                                                                                                                                   | 1                                                                                                                          | 1                                                                                                        | 1                                                                                                                 | 10                           |
| Verazza et al            | 1                                                                                                                                            | 1                                                                                                                                                                   | 0                                                                                                                          | 1                                                                                                        | 1                                                                                                                 | 9                            |
| Wang et al               | 0                                                                                                                                            | 1                                                                                                                                                                   | 1                                                                                                                          | 1                                                                                                        | 0                                                                                                                 | 9                            |
| Webb et al               | 1                                                                                                                                            | 1                                                                                                                                                                   | 0                                                                                                                          | 0                                                                                                        | 0                                                                                                                 | 8                            |
| Total scored as positive | 11                                                                                                                                           | 24                                                                                                                                                                  | 17                                                                                                                         | 15                                                                                                       | 11                                                                                                                |                              |
| Percentage of total      | 38                                                                                                                                           | 83                                                                                                                                                                  | 59                                                                                                                         | 52                                                                                                       | 38                                                                                                                |                              |
